# Supplementary material for: Use of Oral Bisphosphonates in Primary Prevention of Fractures in Postmenopausal Women: A Population-Based Cohort Study
Source: PLOS journal article supplement (doi:10.1371/journal.pone.0118178), 2015-04-10
Supplement: S2 (10.1371/journal.pone.0118178.s002) [file journal.pone.0118178.s002]

**STATEMENT FROM THE CLINICAL INVESTIGATION ETHICS**

Rosa Morros Pedrós, President of the Clinical Ethics Committee of the IDIAP Jordi Gol and Gurina.

To Certify:

That this Committee in its convocation on September 28<sup>th</sup>, 2011 evaluated the research project **(P11/85)** titled: ***Incidence of risk of osteoporotic fracture and its relation with bisphosphonates exposure. Observational study of population clinical data: OSTEOPAC*** presented by Gisela Galindo.

In consideration of the ethical principles and methodology of the investigation, definitive approval has been granted for the abovementioned project.



Signed in Barcelona June 2014.
